# Supplementary material
Source: PubMed Central journal article supplement (PMC6300704)
Supplement: DC181157SupplementaryData.pdf [file DC181157SupplementaryData.pdf]

SUPPLEMENTARY DATA

**Supplementary Table 1. AID Burden Increases with T1DM Age of Onset.**

| Age of T1DM Onset | Number of additional AID |           |           |         |         | n   |
|-------------------|--------------------------|-----------|-----------|---------|---------|-----|
|                   | 0                        | 1         | 2         | 3       | ≥4      |     |
| ≤10               | 217 (68.7)               | 69 (21.8) | 22 (7.0)  | 7 (2.2) | 1 (0.3) | 316 |
| 11-20             | 246 (67.6)               | 81 (22.3) | 31 (8.5)  | 3 (0.8) | 3 (0.8) | 364 |
| 21-30             | 162 (66.7)               | 56 (23.1) | 18 (7.4)  | 6 (2.5) | 1 (0.4) | 243 |
| 31-40             | 87 (59.6)                | 43 (29.5) | 10 (6.9)  | 5 (3.4) | 1 (0.7) | 146 |
| ≥40               | 75 (52.5)                | 41 (28.7) | 16 (11.2) | 6 (4.2) | 5 (3.5) | 143 |

Data are n (row percent).

**Supplementary Table 2. Age of Additional Autoimmune Disease Onset with T1DM Onset**

| AID                              | AID Age of Onset | Age of T1D Onset for Patients With Additional AID |
|----------------------------------|------------------|---------------------------------------------------|
| Type 1 Diabetes                  | 21.2 (14.4)      | -                                                 |
| Thyroid Disease                  | 34.5 (14.7)      | 23.7 (15.4)**                                     |
| Hypothyroidism                   | 34.7 (14.8)      | 23.7 (15.6)**                                     |
| Hyperthyroidism                  | 33.7 (13.7)      | 23.2 (14.5)                                       |
| Pernicious Anemia                | 48.5 (15.1)      | 30.2 (19.1)**                                     |
| Skin and Hair Disorders          | 28.0 (15.2)      | 26.8 (17.9)**                                     |
| Vitiligo                         | 30.8 (14.4)      | 29.1 (18.8)**                                     |
| Alopecia                         | 21.8 (15.1)      | 24.4 (17.9)                                       |
| Collagen Vascular Disease        | 37.3 (17.0)      | 22.4 (16.6)                                       |
| Rheumatoid Arthritis             | 43.9 (12.9)      | 24.3 (20.4)                                       |
| Psoriasis                        | 27.9 (14.7)      | 21.2 (12.1)                                       |
| MCTD                             | 34.3 (6.9)       | 22.5 (12.2)                                       |
| JVRA                             | 3.5 (1.7)        | 22.0 (21.8)                                       |
| Lupus                            | 37.5 (14.2)      | 24.9 (17.9)                                       |
| Sjogren's                        | 57.6 (9.2)       | 23.3 (15.2)                                       |
| Scleroderma                      | 19.0 (0.0)       | 18.0 (0.0)                                        |
| Granulomatosis with polyangiitis | 43.3 (7.6)       | 6.0 (2.6)                                         |
| Gastrointestinal AID             | 37.3 (15.8)      | 25.0 (14.8)                                       |
| Celiac Disease                   | 39.5 (13.5)      | 21.8 (13.6)                                       |
| Ulcerative Colitis               | 32.8 (15.9)      | 28.8 (12.5)                                       |
| Crohn's                          | 34.7 (22.5)      | 28.7 (22.0)                                       |
| Autoimmune Liver Disease         | 34.9 (17.5)      | 25.7 (11.0)                                       |
| Primary Biliary Cirrhosis        | 52.7 (7.6)       | 30.7 (14.6)                                       |
| Primary Sclerosing Cholangitis   | 23.5 (10.5)      | 16.5 (3.5)                                        |
| Autoimmune hepatitis             | 19.5 (5.5)       | 27.5 (6.4)                                        |
| Addison's Disease                | 32.7 (15.4)      | 27.7 (17.8)                                       |
| Premature Ovarian Failure        | 33.0 (4.3)       | 26.6 (13.1)                                       |
| Immune Deficiency Disorders      | 39.4 (16.2)      | 17.0 (11.2)                                       |
| IgA Deficiency                   | 45.8 (15.7)      | 19.3 (11.3)                                       |
| CVID                             | 32.9 (15.8)      | 14.0 (10.5)                                       |
| Neurological Disease             | 30.6 (13.1)      | 16.9 (10.5)                                       |
| Moyamoya†                        | 27.0 (6.7)       | 10.7 (1.5)                                        |
| Multiple Sclerosis               | 31.5 (7.6)       | 22.5 (8.1)                                        |
| Myasthenia Gravis                | 27.0 (3.0)       | 21.5 (12.0)                                       |
| Uveitis                          | 35.2 (17.9)      | 15.2 (13.2)                                       |
| Autoimmune Neuropathy (CIDP)     | 22.0 (2.0)       | 12.0 (14.1)                                       |
| Stiff Person Syndrome            | 33.7 (17.4)      | 24.3 (14.2)                                       |

Data are mean (SD). Age of onset of additional AID in second column. t-test compared age of onset of T1DM for patients with and without the AID. \*p<0.05. \*\*p<0.01. †possible autoimmune etiology.
